# Supplementary material for: Anura (Class Amphibia) Diversity Based on Environmental DNA (eDNA) in the Paddy Field Water Environment
Source: Preprints.org preprint supplement (doi:10.20944/preprints202312.1366.v1), 2023-12-19

**Supplementary Figure 1.** Field survey results of the study area. A circle means directly found frog individuals in the area. A speaker mark means heard croaking sound of frogs in the area. In the study area, we could not hear the croaking sound of *R. huanrensis* and only found an adult individual.


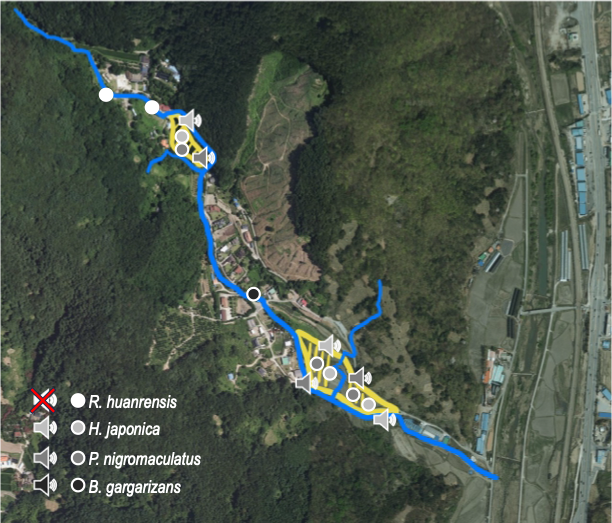


**Supplementary Figure 2.** The photographs of frogs that were taken in the study area. (a-c) *R. huanrensis* adult and tadpole were found near the pond and stream. (d-e) *H. japonica* adult individuals near the paddies. (f-i) *P. nigromaculatus* near the paddies and in the paddies. (j) *B. gargarizans* adult individual that was found outside the paddies.


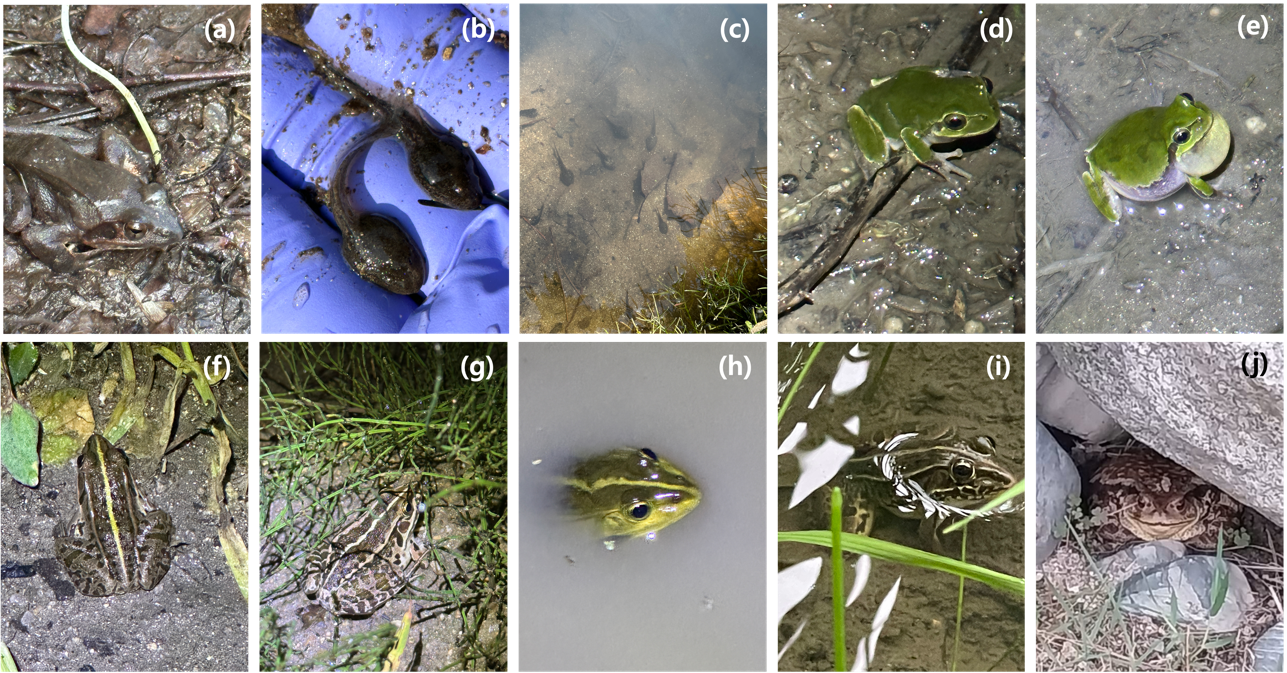

Supplement: Supplementary file 1 [file supplementary]
